# Supplementary material for: Immune Response to Initial and Booster SARS-CoV-2 mRNA Vaccination in Patients Treated with Siponimod—Final Analysis of a Nonrandomized Controlled Clinical Trial (AMA-VACC)
Source: MDPI journal article supplement (doi:10.3390/vaccines11081374), 2023-08-16
Supplement: s1 [file s1 › vaccines-2522764-supplementary.pdf]

**A**

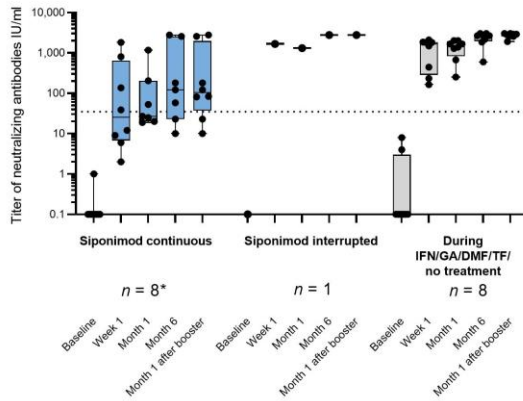

**B**

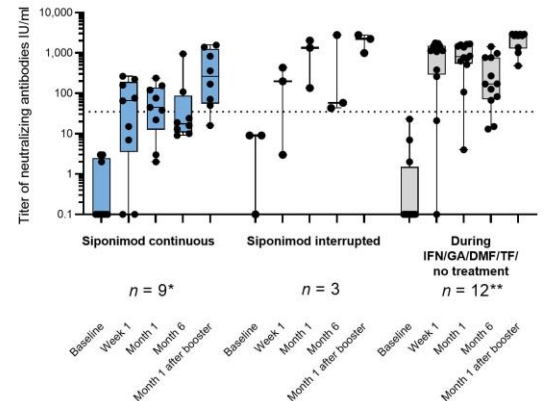

**Figure S1.** SARS-CoV-2-specific neutralizing antibody levels in U/ml by timing of booster vaccination. A) booster vaccination before month 6; \*one sample missing for month 1 and month 6. B) Booster vaccination after month 6. All patients with available data were included in the analysis and individual values are represented by dots. For 10 booster patients, month 6 visit and month 1 after booster visit were identical (cohort 1:  $n = 6$ ; cohort 2:  $n = 1$ ; cohort 3:  $n = 3$ ); \*one sample missing for month 6 and month 1 after booster; \*\*two patients did not receive a booster vaccination. Bars show median values, black dotted lines indicate assay-specific cut-off for seropositivity. DMF: dimethyl fumarate; GA: glatiramer acetate, IFN: interferon-beta; IU: international units;  $n$ : number of patients with assessments; TF: teriflunomide.
